# Supplementary material for: Safety and Efficacy of COVID-19 Vaccines: A Systematic Review and Meta-Analysis of Different Vaccines at Phase 3
Source: MDPI journal article supplement (doi:10.3390/vaccines9090989), 2021-09-04
Supplement: s1 [file s1]

# Supplementary

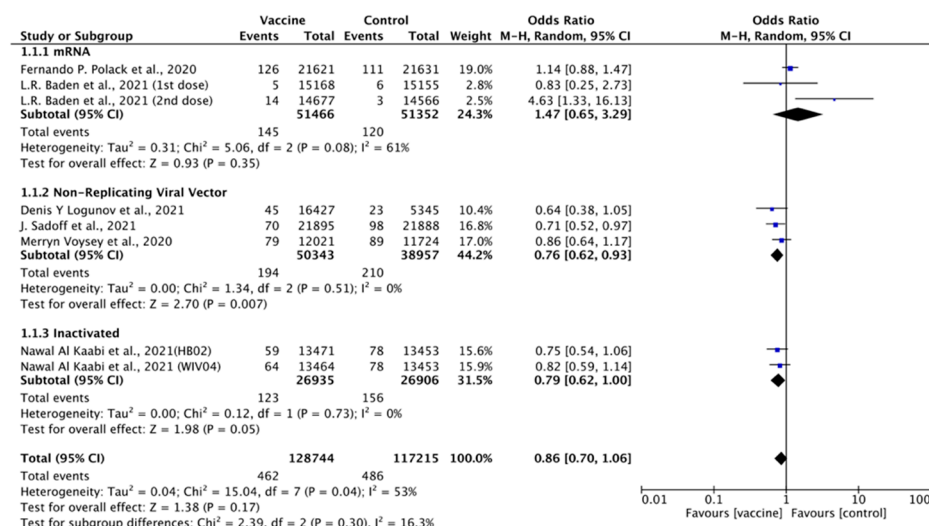

**Figure S1.** Forest plot of association between serious adverse events and COVID-19 vaccine.

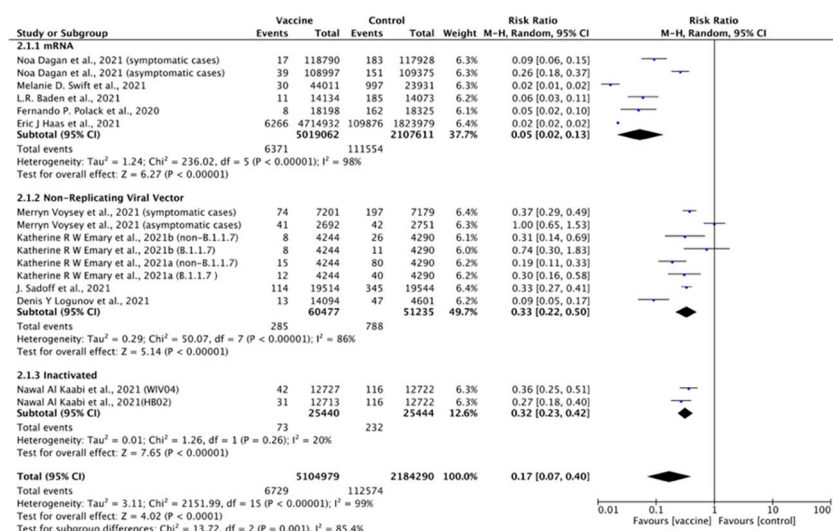

**Figure S2.** Forest plot of association between COVID-19 cases and vaccination after the 2 dose.

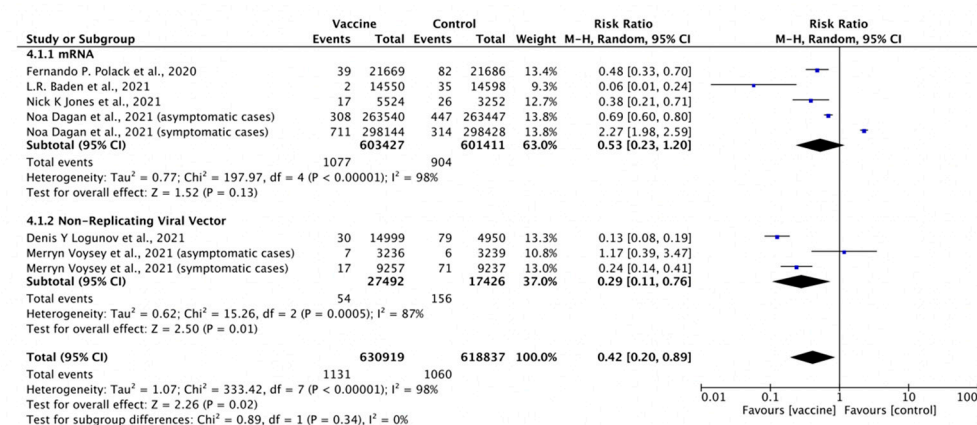

**Figure S3.** Forest plot of association between COVID-19 cases and vaccination after the first dose.

a.

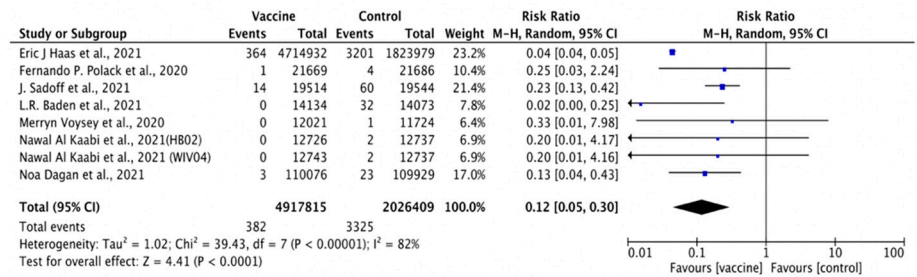

b.

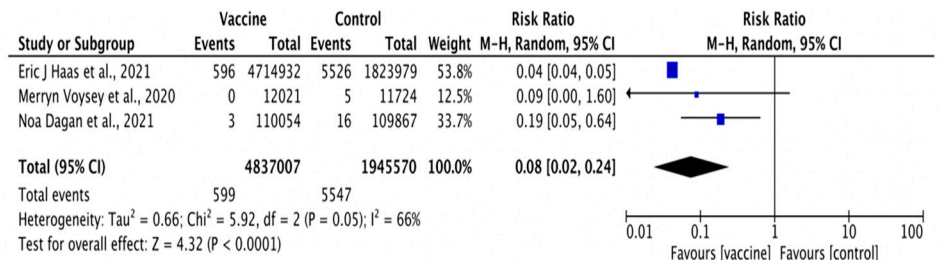

c.

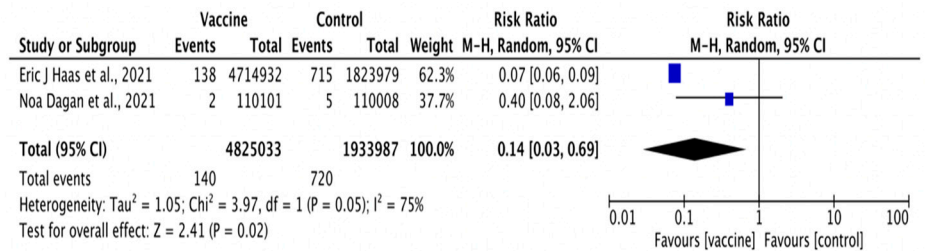

**Figure S4.** Forest plot of association between severity of COVID-19 and vaccines. (a): Severe cases; (b): Hospitalized cases; (c): Death.
